# Supplementary material for: Phosphorylation of 14-3-3ζ links YAP transcriptional activation to hypoxic glycolysis for tumorigenesis
Source: PubMed Central journal article supplement (PMC6510816; doi:10.1038/s41389-019-0143-1), 2019-05-10
Supplement: 41389_2019_143_MOESM1_ESM.pdf [file 41389_2019_143_MOESM1_ESM.pdf]

**Phosphorylation of 14-3-3ζ links YAP transactivation to hypoxic glycolysis for tumorigenesis**

Yu Jia<sup>1+</sup>, Hui-Yan Li<sup>2+</sup>, Jue Wang<sup>3</sup>, Ying Wang<sup>4</sup>, Peng Zhang<sup>5</sup>, Ning Ma<sup>2</sup>, Shi-Jing Mo<sup>2\*</sup>

**Supplemental Information**

Page 1-2: Supplemental Fig. Legends S1-S5

Page 3-4: Supplemental Table S1-S2

**Fig. S1 Hypoxia induces nuclear translocation of YAP in a HIF-1 $\alpha$ -independent manner.** **a** Subcellular fractionation analyses determining abundance of nuclear and cytoplasmic YAP protein in A498 RCC cells (A-4) and Huh-7 HCC cells (H-7) stimulated with hypoxia for 6h. GAPDH and Lamin B were used as internal control of cytoplasmic and nuclear extractions, respectively. Data are expressed as mean  $\pm$  s.d. of three independent experiments. \* $P$  < 0.05, \*\* $P$  < 0.01. Two-sided Student's t test was used to calculate the  $P$  value. **b** Subcellular fractionation analyses comparing levels of nuclear YAP protein expression in SW-1990 PDAC cells stimulated with the indicated concentrations of CoCl<sub>2</sub> for 12h. **c** Subcellular fractionation analyses comparing accumulation of nuclear and cytoplasmic YAP protein in hypoxia-stimulated SW-1990 PDAC cells with or without HIF-1 $\alpha$  siRNA transfection. **d** Coimmunoprecipitation assay evaluating the interaction between Myc-tagged wild-type TEAD4 and nuclear YAP in SW-1990 PDAC cells stimulated with hypoxia for 12h.

**Fig. S2 Hypoxia induces nuclear translocation of YAP in a 14-3-3 $\zeta$ -dependent fashion.** **a** Subcellular fractionation analyses assessing abundance of nuclear and cytoplasmic YAP protein expression in SW-1990 PDAC cells with or without 14-3-3 $\zeta$  siRNA transfection. Data are expressed as mean  $\pm$  s.d. of three independent experiments. \* $P$  < 0.05. Two-sided Student's t test was used to calculate the  $P$  value. **b** Left panel: Western-blotting comparing the levels of Flag expression in SW-1990 PDAC cells with or without Flag-tagged wild-type 14-3-3 $\zeta$  transfection. Right panel: Coimmunoprecipitation assay evaluating the interaction between Myc-TEAD4 and nuclear YAP in SW-1990 PDAC cells stimulated with hypoxia for 12h with or without Flag-tagged wild-type 14-3-3 $\zeta$  transfection. IP, immunoprecipitation. **c** Coimmunoprecipitation assay comparing the interaction between 14-3-3 $\zeta$  and YAP in SW-1990 PDAC cells treated with or without 1 mmol/L CoCl<sub>2</sub> for 12h. Data are expressed as mean  $\pm$  s.d. of three independent experiments. \* $P$  < 0.05. Two-sided ANOVA with Bonferroni post hoc t test correction was used to calculate the  $P$  value. **d** Coimmunoprecipitation assay assessing the interaction between endogenous WWTR1 and YAP in SW-1990 PDAC cells stimulated with or without hypoxia for 12h.

**Fig. S3 ERK1/2 is required for the hypoxia-stimulated YAP nuclear localization.** **a** Western-blotting comparing the levels of p-I $\kappa$ B $\alpha$  and p-ERK1/2 in SW-1990 PDAC cells stimulated with hypoxia in the presence or absence of 5  $\mu$ mol/L BAY 11-7085 (BAY) and 20  $\mu$ mol/L U0126 pretreatment, respectively. **b** Left panel: Western-blotting testing the levels of ERK2 expression in SW-1990 PDAC cells transfected with ERK2 siRNA. Right panel: Coimmunoprecipitation assay determining the interaction between Myc-tagged wild-type TEAD4 and nuclear YAP in SW-1990 PDAC cells with or without serum stimuli (SS) in the presence or absence of ERK2 siRNA transfection. **c** Alignment of the highly conserved Ser37 residue of ERK2 phosphorylation in 14-3-3 $\zeta$  from homo sapiens to drosophila.

**Fig. S4 Hypoxia phosphorylates 14-3-3 $\zeta$  at Ser37 via ERK2.** **a** Coimmunoprecipitation assay detecting the levels of Flag-tagged wild-type 14-3-3 $\zeta$  phosphorylation in hypoxia-stimulated SW-1990 PDAC cells in the presence or absence of 5  $\mu$ mol/L BAY 11-7085 (BAY) and 20  $\mu$ mol/L U0126 administration with an anti-phospho-serine antibody, respectively. **b** Sequencing analysis of Ser37 mutations in 14-3-3 $\zeta$  protein. **c** *Top panel:* Co-IP assay testing the specificity of 14-3-3 $\zeta$

pS37 antibody. *Bottom panel*: Representative immunofluorescence images testing the specificity of 14-3-3 $\zeta$  pS37 antibody in SW-1990 PDAC cells with Flag-tagged wild-type 14-3-3 $\zeta$  (WT) or mutant 14-3-3 $\zeta$  Ser37A (S37A) expression. Scale bar = 25  $\mu$ m. **d** RT-qPCR analyses of YWHAZ gene expression in 14-3-3 $\zeta$  shRNA (sh. 14-3-3 $\zeta$ )-expressed SW-1990 PDAC cells. Experiments were performed five times, each with quantitative RT-PCR in technical duplicate and real-time values were normalized to glyceraldehyde 3-phosphate dehydrogenase (GAPDH). Data are expressed as mean  $\pm$  s.d. \*\*\* $P$  < 0.001. Two-sided Student's t test was used to calculate the  $P$  value.

**Fig. S5 YAP facilitates PKM2 transcription via physical interaction with HIF-1 $\alpha$  in an 14-3-3 $\zeta$  Ser37 phosphorylation-dependent manner under hypoxia.** **a** Coimmunoprecipitation assay examining the interaction between nuclear YAP and HIF-1 $\alpha$  in hypoxia-stimulated SW-1990 PDAC cells with or without ERK2 siRNA transfection. **b** Coimmunoprecipitation assay determining the interaction between nuclear YAP and HIF-1 $\alpha$  in 14-3-3 $\zeta$  shRNA (sh.14-3-3 $\zeta$ )-expressed SW-1990 PDAC cells in the presence or absence of Flag-tagged wild-type 14-3-3 $\zeta$  (WT) or mutant 14-3-3 $\zeta$  S37E (S37E) reconstitution. **c** Top panel: Western blotting results depicting the expression levels of YAP with scrambled shRNA (Scr) or YAP shRNA transfection. Bottom panel: CHIP analysis for HIF-1 $\alpha$  and HIF-2 $\alpha$  binding to PKM2 gene HRE in SW-1990 PDAC cells stimulated with hypoxia in the presence or absence of YAP shRNA transfection using the indicated antibodies. **d** Top panel: Western blotting results depicting the expression levels of HIF-1 $\alpha$  with control siRNA (Ctrl) or HIF-1 $\alpha$  siRNA transfection. Bottom panel: CHIP analysis for YAP binding to PKM2 gene HRE in SW-1990 PDAC cells stimulated with hypoxia in the presence or absence of HIF-1 $\alpha$  siRNA transfection using an anti-YAP antibody. **e** RT-qPCR analyses of PKM2 gene expression in YAP shRNA-expressed SW-1990 PDAC cells with hypoxia stimulation. Experiments were performed five times, each with quantitative RT-PCR in technical duplicate and real-time values were normalized to glyceraldehyde 3-phosphate dehydrogenase (GAPDH). Data are expressed as mean  $\pm$  s.d. \* $P$  < 0.05. Two-sided Student's t test was used to calculate the  $P$  value. **f** Western-blotting measuring levels of PKM2 protein expression in YAP shRNA-expressed SW-1990 PDAC cells with hypoxia stimulation. **g** Representative immunofluorescence images of Flag-tagged 14-3-3 $\zeta$  staining in 14-3-3 $\zeta$  shRNA (sh.14-3-3 $\zeta$ )-expressed SW-1990 PDAC cells with Flag-tagged wild-type 14-3-3 $\zeta$  (WT) or mutant 14-3-3 $\zeta$  Ser37A (S37A) reconstitution. Scale bar = 100  $\mu$ m. **h** Immunohistochemistry analysis of 14-3-3 $\zeta$  p-S37 antibody with or without 14-3-3 $\zeta$  peptide used for developing this antibody or the matched nonphosphorylated 14-3-3 $\zeta$  peptide. Scale bar = 50  $\mu$ m. **i** Representative cases stained by immunohistochemistry (*left panel*) and bar graph (*right panel*) showing the expression of 14-3-3 $\zeta$  p-S37 in 56 primary human PDAC specimens is positively correlated with nuclear localization of YAP. Scale bar = 50  $\mu$ m. The  $P$  value shown was calculated by Spearman order correlations.

**Table S1 Clinicopathological Features in PDAC Patients (n=87)**

| <b>Variable</b>             | <b>No. of patients</b> | <b>%</b> |
|-----------------------------|------------------------|----------|
| <b>Gender</b>               |                        |          |
| Male                        | 50                     | 57.5     |
| Female                      | 37                     | 42.5     |
| <b>Age (years)</b>          |                        |          |
| <60                         | 33                     | 37.9     |
| ≥60                         | 54                     | 62.1     |
| <b>Tumor size</b>           |                        |          |
| ≤40mm                       | 56                     | 64.4     |
| >40mm                       | 31                     | 35.6     |
| <b>Tumor location</b>       |                        |          |
| Head                        | 71                     | 81.6     |
| Body                        | 9                      | 10.3     |
| Tail                        | 7                      | 8.1      |
| <b>Lymphatic metastasis</b> |                        |          |
| Negative                    | 49                     | 56.3     |
| Positive                    | 38                     | 43.7     |
| <b>TNM stage</b>            |                        |          |
| I                           | 22                     | 25.3     |
| II                          | 43                     | 49.4     |
| III                         | 14                     | 16.1     |
| IV                          | 8                      | 9.2      |
| <b>Chemotherapy</b>         |                        |          |
| Yes                         | 72                     | 82.8     |
| No                          | 15                     | 17.2     |
| <b>p-14-3-3ζ expression</b> |                        |          |
| High                        | 45                     | 51.7     |
| Low                         | 42                     | 48.3     |

**Table S2 Correlation Between Phosphorylation of 14-3-3 $\zeta$  and Clinicopathological Features in PDAC Patients**

| Variable             | p-14-3-3 $\zeta$ |                 | P value           |
|----------------------|------------------|-----------------|-------------------|
|                      | High<br>(n = 45) | Low<br>(n = 42) |                   |
| Gender               |                  |                 | 0.313             |
| Male                 | 27 (60.0%)       | 23 (54.8%)      |                   |
| Female               | 18 (40.0%)       | 19 (45.2%)      |                   |
| Age (years)          |                  |                 | <b>0.015</b>      |
| <60                  | 22 (48.9%)       | 11 (26.2%)      |                   |
| $\geq$ 60            | 23 (51.1%)       | 31 (73.8%)      |                   |
| Tumor size           |                  |                 | <b>&lt; 0.001</b> |
| $\leq$ 40mm          | 20 (44.4%)       | 36 (85.7%)      |                   |
| >40mm                | 25 (55.6%)       | 6 (14.3%)       |                   |
| Tumor location       |                  |                 | 0.103             |
| Head                 | 37 (82.2%)       | 34 (81.0%)      |                   |
| Body                 | 6 (13.3%)        | 3 (7.1%)        |                   |
| Tail                 | 2 (4.5%)         | 5 (11.9%)       |                   |
| Lymphatic metastasis |                  |                 | <b>0.031</b>      |
| Negative             | 21 (46.7%)       | 28 (66.7%)      |                   |
| Positive             | 24 (53.3%)       | 14 (33.3%)      |                   |
| TNM stage            |                  |                 | 0.200             |
| I                    | 14 (31.1%)       | 8 (19.0%)       |                   |
| II                   | 17 (37.8%)       | 26 (61.9%)      |                   |
| III                  | 8 (17.8%)        | 6 (14.3%)       |                   |
| IV                   | 6 (13.3%)        | 2 (4.8%)        |                   |
| Chemotherapy         |                  |                 | 0.104             |
| Yes                  | 35 (77.8%)       | 37 (88.1%)      |                   |
| No                   | 10 (22.2%)       | 5 (11.9%)       |                   |
